# Supplementary material for: Enhancing the interactions between neutral molecular tweezers and anions
Source: Royal Society of Chemistry journal article supplement (doi:10.1039/b915483c), 2009-11-10
Supplement: b915483c.pdf [file b915483c.pdf]

## Enhancing the Interactions Between Neutral Molecular Tweezers and Anions

Jose M. Hermida-Ramón, Marcos Mandado, Marta Sánchez-Lozano, and Carlos M. Estévez\*  
*Departamento de Química Física. Facultad de Química. Universidade de Vigo. Lagoas-Marcosende 36310 Vigo, Spain*

### Supporting Information

Cartesian coordinates (in Å) and energies (in hartrees) for the optimized structures at the MPW1B95/6-31+G\* level

#### 2-F Monomer

```
NATOMS      58
Energy MPW1B95: -3146.689503
O      3.219764   -4.685034    0.000317
C      2.679179   -3.882486    1.087831
C      1.195341   -3.868454    0.703312
C      1.195445   -3.869371   -0.703278
C      2.679338   -3.882708   -1.087429
C     -0.000060   -3.847449    1.416172
C     -1.195452   -3.868482    0.703123
C     -1.195324   -3.869341   -0.703466
C      0.000063   -3.849353   -1.416368
C     -2.679156   -3.882554   -1.087853
C     -3.236063   -2.505073   -0.703924
C     -3.236862   -2.505409    0.703722
C     -2.679351   -3.882639    1.087407
C     -3.650843   -1.389937    1.405740
C     -4.094698   -0.252712    0.701198
C     -4.093804   -0.252321   -0.701188
C     -3.649123   -1.389175   -1.405813
O     -4.530339    0.831059   -1.443033
C     -4.979818    1.906511   -0.701829
C     -4.980671    1.906134    0.701928
O     -4.532110    0.830277    1.443098
C     -5.446821    3.028004   -1.395510
C     -5.914770    4.150915   -0.699009
C     -5.915611    4.150543    0.699178
C     -5.448508    3.027259    1.395643
O     -3.219768   -4.685027   -0.000312
C      3.236223   -2.505189   -0.703624
C      3.236712   -2.505293    0.704023
C      3.649428   -1.389408   -1.405613
C      4.093956   -0.252435   -0.701082
C      4.094546   -0.252593    0.701305
C      3.650538   -1.389700    1.405941
O      4.530647    0.830823   -1.443013
C      4.979964    1.906398   -0.701891
C      4.980522    1.906251    0.701867
O      4.531803    0.830517    1.443119
C      5.447111    3.027779   -1.395656
```

Supplementary Material for PCCP  
This journal is © The Owner Societies 2009

|   |           |           |           |
|---|-----------|-----------|-----------|
| C | 5.914913  | 4.150804  | -0.699242 |
| C | 5.915464  | 4.150660  | 0.698945  |
| C | 5.448214  | 3.027489  | 1.395496  |
| F | -5.447977 | 3.031658  | -2.743225 |
| F | -6.361263 | 5.225014  | -1.377762 |
| F | -6.362930 | 5.224278  | 1.377965  |
| F | -5.451300 | 3.030188  | 2.743356  |
| F | -3.653993 | -1.355435 | -2.761872 |
| F | -3.656924 | -1.356779 | 2.761808  |
| F | 0.000229  | -3.840660 | -2.780433 |
| F | -0.000224 | -3.838016 | 2.780233  |
| F | 3.656353  | -1.356326 | 2.762005  |
| F | 3.654560  | -1.355883 | -2.761675 |
| F | 5.448550  | 3.031212  | -2.743372 |
| F | 6.361546  | 5.224793  | -1.378077 |
| F | 6.362637  | 5.224506  | 1.377650  |
| F | 5.450723  | 3.030640  | 2.743210  |
| H | 2.954548  | -4.293306 | 2.063863  |
| H | 2.955170  | -4.293507 | -2.063340 |
| H | -2.954853 | -4.293195 | -2.063868 |
| H | -2.954855 | -4.293616 | 2.063335  |

**2-CN Monomer**

NATOMS 72

Energy MPW1B95: -3048.568927

|   |           |           |           |
|---|-----------|-----------|-----------|
| O | -3.195145 | 0.000000  | -4.863879 |
| C | -2.675183 | 1.088146  | -4.049435 |
| C | -1.192282 | 0.700279  | -4.001749 |
| C | -1.192282 | -0.700279 | -4.001749 |
| C | -2.675183 | -1.088146 | -4.049435 |
| C | 0.000000  | 1.450321  | -3.979829 |
| C | 1.192282  | 0.700279  | -4.001749 |
| C | 1.192282  | -0.700279 | -4.001749 |
| C | 0.000000  | -1.450321 | -3.979829 |
| C | 2.675183  | -1.088146 | -4.049435 |
| C | 3.269890  | -0.699422 | -2.689844 |
| C | 3.269890  | 0.699422  | -2.689844 |
| C | 2.675183  | 1.088146  | -4.049435 |
| C | 3.745928  | 1.437108  | -1.598007 |
| C | 4.247651  | 0.698368  | -0.496532 |
| C | 4.247651  | -0.698368 | -0.496532 |
| C | 3.745928  | -1.437108 | -1.598007 |
| O | 4.745869  | -1.419659 | 0.573563  |
| C | 5.242966  | -0.701391 | 1.631621  |
| C | 5.242966  | 0.701391  | 1.631621  |
| O | 4.745869  | 1.419659  | 0.573563  |
| C | 5.756570  | -1.419612 | 2.725714  |
| C | 6.280807  | -0.707418 | 3.843660  |
| C | 6.280807  | 0.707418  | 3.843660  |
| C | 5.756570  | 1.419612  | 2.725714  |
| O | 3.195145  | 0.000000  | -4.863879 |
| C | -3.269890 | -0.699422 | -2.689844 |
| C | -3.269890 | 0.699422  | -2.689844 |
| C | -3.745928 | -1.437108 | -1.598007 |
| C | -4.247651 | -0.698368 | -0.496532 |
| C | -4.247651 | 0.698368  | -0.496532 |

Supplementary Material for PCCP  
This journal is © The Owner Societies 2009

|   |           |           |           |
|---|-----------|-----------|-----------|
| C | -3.745928 | 1.437108  | -1.598007 |
| O | -4.745869 | -1.419659 | 0.573563  |
| C | -5.242966 | -0.701391 | 1.631621  |
| C | -5.242966 | 0.701391  | 1.631621  |
| O | -4.745869 | 1.419659  | 0.573563  |
| C | -5.756570 | -1.419612 | 2.725714  |
| C | -6.280807 | -0.707418 | 3.843660  |
| C | -6.280807 | 0.707418  | 3.843660  |
| C | -5.756570 | 1.419612  | 2.725714  |
| H | -2.938925 | 2.067051  | -4.464651 |
| H | -2.938925 | -2.067051 | -4.464651 |
| H | 2.938925  | -2.067051 | -4.464651 |
| H | 2.938925  | 2.067051  | -4.464651 |
| C | 6.803681  | 1.428153  | 4.959281  |
| N | 7.233328  | 2.024698  | 5.876699  |
| C | 6.803681  | -1.428153 | 4.959281  |
| N | 7.233328  | -2.024698 | 5.876699  |
| C | 5.741480  | -2.845800 | 2.696589  |
| N | 5.725324  | -4.020858 | 2.666740  |
| C | 5.741480  | 2.845800  | 2.696589  |
| N | 5.725324  | 4.020858  | 2.666740  |
| C | 3.754281  | 2.865177  | -1.587199 |
| N | 3.749215  | 4.040613  | -1.613235 |
| C | 3.754281  | -2.865177 | -1.587199 |
| N | 3.749215  | -4.040613 | -1.613235 |
| C | 0.000000  | 2.880797  | -3.977544 |
| N | 0.000000  | 4.056888  | -3.974923 |
| C | 0.000000  | -2.880797 | -3.977544 |
| N | 0.000000  | -4.056888 | -3.974923 |
| C | -3.754281 | 2.865177  | -1.587199 |
| N | -3.749215 | 4.040613  | -1.613235 |
| C | -3.754281 | -2.865177 | -1.587199 |
| N | -3.749215 | -4.040613 | -1.613235 |
| C | -5.741480 | 2.845800  | 2.696589  |
| N | -5.725324 | 4.020858  | 2.666740  |
| C | -6.803681 | 1.428153  | 4.959281  |
| N | -7.233328 | 2.024698  | 5.876699  |
| C | -6.803681 | -1.428153 | 4.959281  |
| N | -7.233328 | -2.024698 | 5.876699  |
| C | -5.741480 | -2.845800 | 2.696589  |
| N | -5.725324 | -4.020858 | 2.666740  |

## 2-F...Cl- Complex

NATOMS 59

Energy MPW1B95: -3607.048180

|    |           |           |           |
|----|-----------|-----------|-----------|
| Cl | -0.859839 | 0.000032  | -0.000460 |
| O  | -0.877735 | -3.236838 | 1.427218  |
| C  | -2.030814 | -3.012881 | 0.701284  |
| C  | -2.031195 | -3.012511 | -0.701328 |
| O  | -0.878254 | -3.236093 | -1.427799 |
| C  | -3.219167 | -2.782274 | -1.394945 |
| C  | -4.412853 | -2.554481 | -0.697479 |
| C  | -4.412555 | -2.554779 | 0.698159  |
| C  | -3.218693 | -2.782913 | 1.395217  |
| C  | 0.290075  | -3.126419 | 0.701240  |
| C  | 0.289755  | -3.125972 | -0.702287 |

Supplementary Material for PCCP  
 This journal is © The Owner Societies 2009

|   |           |           |           |
|---|-----------|-----------|-----------|
| C | 1.503084  | -3.035144 | -1.405047 |
| C | 2.693413  | -2.960779 | -0.704217 |
| C | 2.693663  | -2.961246 | 0.702634  |
| C | 1.503541  | -3.036037 | 1.403742  |
| C | 4.148142  | -2.668650 | 1.085665  |
| C | 4.360122  | -1.197458 | 0.703148  |
| C | 4.359979  | -1.196986 | -0.704051 |
| C | 4.147819  | -2.667932 | -1.087493 |
| O | 4.853616  | -3.331573 | -0.001238 |
| C | 4.361043  | 0.000365  | -1.413184 |
| C | 4.360149  | 1.197207  | -0.703182 |
| C | 4.360091  | 1.196731  | 0.704019  |
| C | 4.361134  | -0.000618 | 1.413152  |
| C | 4.148011  | 2.667674  | 1.087487  |
| C | 2.693607  | 2.960591  | 0.704285  |
| C | 2.693789  | 2.961090  | -0.702573 |
| C | 4.148230  | 2.668415  | -1.085679 |
| C | 1.503275  | 3.035074  | 1.405083  |
| C | 0.289940  | 3.126075  | 0.702357  |
| C | 0.290163  | 3.126563  | -0.701140 |
| C | 1.503659  | 3.036067  | -1.403621 |
| O | -0.878054 | 3.236144  | 1.428023  |
| C | -2.030942 | 3.012782  | 0.701495  |
| C | -2.030701 | 3.013201  | -0.701140 |
| O | -0.877586 | 3.237062  | -1.427130 |
| C | -3.218500 | 2.783225  | -1.395262 |
| C | -4.412264 | 2.554951  | -0.698208 |
| C | -4.412500 | 2.554490  | 0.697467  |
| C | -3.218977 | 2.782362  | 1.395072  |
| O | 4.853796  | 3.331288  | 0.001199  |
| F | -3.225448 | -2.767132 | 2.747559  |
| F | -3.225911 | -2.765725 | -2.747231 |
| F | -3.225652 | 2.765771  | 2.747333  |
| F | -3.224718 | 2.767458  | -2.747537 |
| F | -5.565691 | -2.348488 | -1.378242 |
| F | -5.565106 | -2.348981 | 1.379444  |
| F | -5.565525 | 2.348239  | 1.377867  |
| F | -5.565077 | 2.349258  | -1.379131 |
| F | 1.477610  | -3.014968 | -2.765318 |
| F | 1.478342  | -3.016635 | 2.764024  |
| F | 1.478456  | 3.016778  | -2.763919 |
| F | 1.477755  | 3.014829  | 2.765363  |
| F | 4.330788  | 0.000873  | -2.780767 |
| F | 4.330954  | -0.001127 | 2.780739  |
| H | 4.508088  | 3.006793  | 2.063679  |
| H | 4.508509  | 3.008185  | -2.061570 |
| H | 4.507828  | -3.007078 | -2.063701 |
| H | 4.508448  | -3.008433 | 2.061542  |

**2-F...Br- Complex**

NATOMS 59

Energy MPW1B95: -5718.619972

|    |          |           |           |
|----|----------|-----------|-----------|
| Br | 0.549092 | -0.001189 | -0.001912 |
| O  | 0.877004 | 3.387460  | 1.418369  |
| C  | 2.008554 | 3.047040  | 0.700994  |
| C  | 2.008716 | 3.046366  | -0.701223 |

Supplementary Material for PCCP  
This journal is © The Owner Societies 2009

|   |           |           |           |
|---|-----------|-----------|-----------|
| O | 0.877487  | 3.386380  | -1.419186 |
| C | 3.167067  | 2.697724  | -1.395980 |
| C | 4.333652  | 2.359189  | -0.697676 |
| C | 4.333459  | 2.360003  | 0.698787  |
| C | 3.166643  | 2.699140  | 1.396431  |
| C | -0.299397 | 3.273239  | 0.700540  |
| C | -0.299135 | 3.272626  | -0.701711 |
| C | -1.506461 | 3.139254  | -1.406667 |
| C | -2.691683 | 3.020585  | -0.704474 |
| C | -2.691920 | 3.021162  | 0.702617  |
| C | -1.506971 | 3.140413  | 1.405157  |
| C | -4.132761 | 2.670899  | 1.085611  |
| C | -4.292164 | 1.193115  | 0.702928  |
| C | -4.292031 | 1.192540  | -0.703839 |
| C | -4.132436 | 2.670023  | -1.087639 |
| O | -4.863957 | 3.307019  | -0.001371 |
| C | -4.288464 | -0.003973 | -1.413920 |
| C | -4.290610 | -1.199885 | -0.702790 |
| C | -4.290583 | -1.199291 | 0.703981  |
| C | -4.288604 | -0.002766 | 1.414061  |
| C | -4.127691 | -2.676386 | 1.087834  |
| C | -2.686080 | -3.023487 | 0.704775  |
| C | -2.686233 | -3.024191 | -0.702311 |
| C | -4.127865 | -2.677334 | -1.085413 |
| C | -1.500623 | -3.139456 | 1.407048  |
| C | -0.292993 | -3.270291 | 0.702175  |
| C | -0.293177 | -3.271129 | -0.700066 |
| C | -1.500975 | -3.141004 | -1.404765 |
| O | 0.883752  | -3.381793 | 1.419788  |
| C | 2.014730  | -3.041389 | 0.701708  |
| C | 2.014519  | -3.042197 | -0.700524 |
| O | 0.883355  | -3.383496 | -1.417878 |
| C | 3.172647  | -2.694383 | -1.395946 |
| C | 4.339563  | -2.355232 | -0.698385 |
| C | 4.339806  | -2.354540 | 0.698021  |
| C | 3.173096  | -2.692803 | 1.396356  |
| O | -4.857665 | -3.315080 | 0.001548  |
| F | 3.171914  | 2.684744  | 2.748197  |
| F | 3.172609  | 2.681800  | -2.747762 |
| F | 3.178765  | -2.676839 | 2.748185  |
| F | 3.177919  | -2.680086 | -2.747793 |
| F | 5.468236  | 2.070082  | -1.377551 |
| F | 5.467907  | 2.071820  | 1.379302  |
| F | 5.474644  | -2.066309 | 1.377918  |
| F | 5.474157  | -2.067656 | -1.378969 |
| F | -1.479069 | 3.108664  | -2.766099 |
| F | -1.480082 | 3.110954  | 2.764638  |
| F | -1.474088 | -3.111702 | -2.764254 |
| F | -1.473386 | -3.108684 | 2.766505  |
| F | -4.269001 | -0.004568 | -2.781517 |
| F | -4.269222 | -0.002135 | 2.781668  |
| H | -4.499861 | -3.001650 | 2.064263  |
| H | -4.500225 | -3.003403 | -2.061501 |
| H | -4.505305 | 2.994440  | -2.064083 |
| H | -4.505940 | 2.996060  | 2.061691  |

**2-F...I- Complex**

NATOMS 59

Energy MPW1B95: -3258.709251

|   |           |           |           |
|---|-----------|-----------|-----------|
| I | 0.000000  | 0.000000  | 0.701628  |
| O | 3.736785  | 1.428252  | 0.763551  |
| C | 3.596353  | 0.701621  | 1.928796  |
| C | 3.596353  | -0.701621 | 1.928796  |
| O | 3.736785  | -1.428252 | 0.763551  |
| C | 3.461288  | -1.395675 | 3.132781  |
| C | 3.331726  | -0.698195 | 4.340706  |
| C | 3.331726  | 0.698195  | 4.340706  |
| C | 3.461288  | 1.395675  | 3.132781  |
| C | 3.536920  | 0.700975  | -0.395310 |
| C | 3.536920  | -0.700975 | -0.395310 |
| C | 3.311535  | -1.405220 | -1.590503 |
| C | 3.100974  | -0.703476 | -2.762491 |
| C | 3.100974  | 0.703476  | -2.762491 |
| C | 3.311535  | 1.405220  | -1.590503 |
| C | 2.677238  | 1.086893  | -4.183287 |
| C | 1.195489  | 0.703236  | -4.282797 |
| C | 1.195489  | -0.703236 | -4.282797 |
| C | 2.677238  | -1.086893 | -4.183287 |
| O | 3.280900  | 0.000000  | -4.943746 |
| C | 0.000000  | -1.414742 | -4.270383 |
| C | -1.195489 | -0.703236 | -4.282797 |
| C | -1.195489 | 0.703236  | -4.282797 |
| C | 0.000000  | 1.414742  | -4.270383 |
| C | -2.677238 | 1.086893  | -4.183287 |
| C | -3.100974 | 0.703476  | -2.762491 |
| C | -3.100974 | -0.703476 | -2.762491 |
| C | -2.677238 | -1.086893 | -4.183287 |
| C | -3.311535 | 1.405220  | -1.590503 |
| C | -3.536920 | 0.700975  | -0.395310 |
| C | -3.536920 | -0.700975 | -0.395310 |
| C | -3.311535 | -1.405220 | -1.590503 |
| O | -3.736785 | 1.428252  | 0.763551  |
| C | -3.596353 | 0.701621  | 1.928796  |
| C | -3.596353 | -0.701621 | 1.928796  |
| O | -3.736785 | -1.428252 | 0.763551  |
| C | -3.461288 | -1.395675 | 3.132781  |
| C | -3.331726 | -0.698195 | 4.340706  |
| C | -3.331726 | 0.698195  | 4.340706  |
| C | -3.461288 | 1.395675  | 3.132781  |
| O | -3.280900 | 0.000000  | -4.943746 |
| F | 3.454095  | 2.747030  | 3.141001  |
| F | 3.454095  | -2.747030 | 3.141001  |
| F | -3.454095 | 2.747030  | 3.141001  |
| F | -3.454095 | -2.747030 | 3.141001  |
| F | 3.224034  | -1.377915 | 5.506220  |
| F | 3.224034  | 1.377915  | 5.506220  |
| F | -3.224034 | 1.377915  | 5.506220  |
| F | -3.224034 | -1.377915 | 5.506220  |
| F | 3.291673  | -2.764071 | -1.560377 |
| F | 3.291673  | 2.764071  | -1.560377 |
| F | -3.291673 | -2.764071 | -1.560377 |
| F | -3.291673 | 2.764071  | -1.560377 |

Supplementary Material for PCCP  
This journal is © The Owner Societies 2009

|   |           |           |           |
|---|-----------|-----------|-----------|
| F | 0.000000  | -2.781679 | -4.257192 |
| F | 0.000000  | 2.781679  | -4.257192 |
| H | -2.984351 | 2.063366  | -4.570458 |
| H | -2.984351 | -2.063366 | -4.570458 |
| H | 2.984351  | -2.063366 | -4.570458 |
| H | 2.984351  | 2.063366  | -4.570458 |

**2-CN...Cl- Complex**

NATOMS 73

Energy MPW1B95 : -3508.978953

|   |           |           |           |
|---|-----------|-----------|-----------|
| C | -2.997328 | 2.815976  | 1.417030  |
| C | -1.795849 | 2.898627  | 0.697894  |
| C | -1.797030 | 2.894215  | -0.708277 |
| C | -3.000118 | 2.806698  | -1.424173 |
| C | -4.231240 | 2.704398  | -0.708255 |
| C | -4.229903 | 2.709083  | 0.704338  |
| O | -0.635876 | 3.063935  | 1.404139  |
| C | 0.540278  | 2.986023  | 0.693299  |
| C | 0.539262  | 2.981937  | -0.708230 |
| O | -0.638211 | 3.055907  | -1.417561 |
| C | 1.746334  | 2.960644  | 1.428331  |
| C | 2.939351  | 2.905372  | 0.689076  |
| C | 2.938678  | 2.901091  | -0.706065 |
| C | 1.744677  | 2.952086  | -1.444406 |
| C | 4.404613  | 2.664618  | 1.077917  |
| O | 5.088019  | 3.339777  | -0.010382 |
| C | 4.403974  | 2.657771  | -1.094016 |
| C | 4.635251  | 1.190986  | -0.703661 |
| C | 4.635533  | 1.195337  | 0.696934  |
| C | 4.665919  | -0.004694 | -1.448153 |
| C | 4.635583  | -1.195909 | -0.696392 |
| C | 4.635069  | -1.191536 | 0.704196  |
| C | 4.665718  | 0.004128  | 1.448694  |
| C | 4.404509  | -2.665190 | -1.077369 |
| C | 2.939168  | -2.905821 | -0.688655 |
| C | 2.938353  | -2.901357 | 0.706476  |
| C | 4.403644  | -2.658268 | 1.094566  |
| O | 5.087721  | -3.340386 | 0.011039  |
| C | 1.744160  | -2.951943 | 1.444486  |
| C | 0.538868  | -2.981464 | 0.708086  |
| C | 0.539889  | -2.985744 | -0.693423 |
| C | 1.746238  | -2.960920 | -1.428038 |
| O | -0.636322 | -3.063427 | -1.404341 |
| C | -1.796305 | -2.898157 | -0.697967 |
| C | -1.797424 | -2.893561 | 0.708192  |
| O | -0.638579 | -3.054730 | 1.417490  |
| C | -3.000351 | -2.806092 | 1.424368  |
| C | -4.231678 | -2.704043 | 0.708840  |
| C | -4.230569 | -2.708977 | -0.703735 |
| C | -2.998140 | -2.815992 | -1.416619 |
| C | 4.718921  | 0.007437  | 2.878632  |
| N | 4.798365  | 0.009085  | 4.052304  |
| C | 4.719338  | -0.008022 | -2.878082 |
| N | 4.798976  | -0.009713 | -4.051741 |
| C | 1.737438  | -2.986610 | 2.872033  |

Supplementary Material for PCCP  
This journal is © The Owner Societies 2009

|    |           |           |           |
|----|-----------|-----------|-----------|
| N  | 1.782450  | -3.047770 | 4.045593  |
| C  | 1.742014  | -3.004395 | -2.855358 |
| N  | 1.789780  | -3.072589 | -4.028423 |
| C  | -2.973527 | -2.864490 | -2.841577 |
| N  | -2.961956 | -2.928533 | -4.015597 |
| C  | -5.461250 | -2.643029 | -1.424169 |
| N  | -6.474814 | -2.604914 | -2.019407 |
| C  | -5.463506 | -2.633850 | 1.426898  |
| N  | -6.478069 | -2.593033 | 2.020252  |
| C  | -2.977808 | -2.843769 | 2.849692  |
| N  | -2.968007 | -2.898293 | 4.024208  |
| C  | 1.738551  | 2.987193  | -2.871934 |
| N  | 1.784121  | 3.048779  | -4.045450 |
| C  | 1.741673  | 3.003559  | 2.855651  |
| N  | 1.788936  | 3.071210  | 4.028769  |
| C  | -2.978111 | 2.844829  | -2.849485 |
| N  | -2.968742 | 2.899872  | -4.023981 |
| C  | -5.463226 | 2.634066  | -1.426044 |
| N  | -6.477908 | 2.593112  | -2.019184 |
| C  | -5.460469 | 2.643105  | 1.424961  |
| N  | -6.473895 | 2.605006  | 2.020437  |
| C  | -2.972161 | 2.863735  | 2.841985  |
| N  | -2.960114 | 2.926952  | 4.016046  |
| Cl | -0.613794 | 0.000221  | -0.004825 |
| H  | 4.751535  | 3.013387  | 2.056394  |
| H  | 4.750952  | 2.999715  | -2.074877 |
| H  | 4.751562  | -3.013992 | -2.055787 |
| H  | 4.750506  | -3.000173 | 2.075481  |

**2-CN...Br- Complex**

NATOMS 73

Energy MPW1B95: -5620.548603

|    |           |           |           |
|----|-----------|-----------|-----------|
| Br | 0.000000  | 0.000000  | 0.449647  |
| O  | 3.211571  | 1.407154  | 0.624923  |
| C  | 2.991318  | 0.703036  | 1.778563  |
| C  | 2.991318  | -0.703036 | 1.778563  |
| O  | 3.211571  | -1.407154 | 0.624923  |
| C  | 2.851963  | -1.421356 | 2.975398  |
| C  | 2.693258  | -0.706352 | 4.201069  |
| C  | 2.693258  | 0.706352  | 4.201069  |
| C  | 2.851963  | 1.421356  | 2.975398  |
| C  | 3.110181  | 0.700537  | -0.554499 |
| C  | 3.110181  | -0.700537 | -0.554499 |
| C  | 3.037350  | -1.437682 | -1.756818 |
| C  | 2.944079  | -0.697430 | -2.945807 |
| C  | 2.944079  | 0.697430  | -2.945807 |
| C  | 3.037350  | 1.437682  | -1.756818 |
| C  | 2.666558  | 1.086067  | -4.403007 |
| C  | 1.193616  | 0.700362  | -4.606238 |
| C  | 1.193616  | -0.700362 | -4.606238 |
| C  | 2.666558  | -1.086067 | -4.403007 |
| O  | 3.330146  | 0.000000  | -5.102671 |
| C  | 0.000000  | -1.448180 | -4.631902 |
| C  | -1.193616 | -0.700362 | -4.606238 |
| C  | -1.193616 | 0.700362  | -4.606238 |
| C  | 0.000000  | 1.448180  | -4.631902 |



Supplementary Material for PCCP  
This journal is © The Owner Societies 2009

|   |           |           |           |
|---|-----------|-----------|-----------|
| C | -2.666558 | 1.086067  | -4.403007 |
| C | -2.944079 | 0.697430  | -2.945807 |
| C | -2.944079 | -0.697430 | -2.945807 |
| C | -2.666558 | -1.086067 | -4.403007 |
| C | -3.037350 | 1.437682  | -1.756818 |
| C | -3.110181 | 0.700537  | -0.554499 |
| C | -3.110181 | -0.700537 | -0.554499 |
| C | -3.037350 | -1.437682 | -1.756818 |
| O | -3.211571 | 1.407154  | 0.624923  |
| C | -2.991318 | 0.703036  | 1.778563  |
| C | -2.991318 | -0.703036 | 1.778563  |
| O | -3.211571 | -1.407154 | 0.624923  |
| C | -2.851963 | -1.421356 | 2.975398  |
| C | -2.693258 | -0.706352 | 4.201069  |
| C | -2.693258 | 0.706352  | 4.201069  |
| C | -2.851963 | 1.421356  | 2.975398  |
| O | -3.330146 | 0.000000  | -5.102671 |
| H | -3.008010 | 2.065847  | -4.753652 |
| H | -3.008010 | -2.065847 | -4.753652 |
| H | 3.008010  | -2.065847 | -4.753652 |
| H | 3.008010  | 2.065847  | -4.753652 |
| C | -3.053993 | 2.865216  | -1.756493 |
| N | -3.097784 | 4.039242  | -1.809254 |
| C | -3.053993 | -2.865216 | -1.756493 |
| N | -3.097784 | -4.039242 | -1.809254 |
| C | 0.000000  | 2.877976  | -4.691109 |
| N | 0.000000  | 4.050851  | -4.780687 |
| C | 0.000000  | -2.877976 | -4.691109 |
| N | 0.000000  | -4.050851 | -4.780687 |
| C | 3.053993  | -2.865216 | -1.756493 |
| N | 3.097784  | -4.039242 | -1.809254 |
| C | 3.053993  | 2.865216  | -1.756493 |
| N | 3.097784  | 4.039242  | -1.809254 |
| C | -2.897600 | -2.846283 | 2.954119  |
| N | -2.960132 | -4.020455 | 2.947098  |
| C | -2.897600 | 2.846283  | 2.954119  |
| N | -2.960132 | 4.020455  | 2.947098  |
| C | -2.567082 | 1.424734  | 5.428238  |
| N | -2.472854 | 2.016838  | 6.439988  |
| C | -2.567082 | -1.424734 | 5.428238  |
| N | -2.472854 | -2.016838 | 6.439988  |
| C | 2.897600  | 2.846283  | 2.954119  |
| N | 2.960132  | 4.020455  | 2.947098  |
| C | 2.897600  | -2.846283 | 2.954119  |
| N | 2.960132  | -4.020455 | 2.947098  |
| C | 2.567082  | -1.424734 | 5.428238  |
| N | 2.472854  | -2.016838 | 6.439988  |
| C | 2.567082  | 1.424734  | 5.428238  |
| N | 2.472854  | 2.016838  | 6.439988  |

**2-CN...I- Complex**

NATOMS 73

Energy MPW1B95: -3160.634049

|   |          |          |          |
|---|----------|----------|----------|
| I | 0.000000 | 0.000000 | 0.453816 |
| O | 3.540112 | 1.405192 | 0.576160 |
| C | 3.336154 | 0.702806 | 1.735773 |

Supplementary Material for PCCP  
This journal is © The Owner Societies 2009

|   |           |           |           |
|---|-----------|-----------|-----------|
| C | 3.336154  | -0.702806 | 1.735773  |
| O | 3.540112  | -1.405192 | 0.576160  |
| C | 3.212731  | -1.422166 | 2.934656  |
| C | 3.053306  | -0.706584 | 4.159449  |
| C | 3.053306  | 0.706584  | 4.159449  |
| C | 3.212731  | 1.422166  | 2.934656  |
| C | 3.378017  | 0.700153  | -0.599665 |
| C | 3.378017  | -0.700153 | -0.599665 |
| C | 3.222966  | -1.437965 | -1.794951 |
| C | 3.045001  | -0.697856 | -2.973299 |
| C | 3.045001  | 0.697856  | -2.973299 |
| C | 3.222966  | 1.437965  | -1.794951 |
| C | 2.673636  | 1.086428  | -4.408404 |
| C | 1.192497  | 0.700200  | -4.532336 |
| C | 1.192497  | -0.700200 | -4.532336 |
| C | 2.673636  | -1.086428 | -4.408404 |
| O | 3.294250  | 0.000000  | -5.148474 |
| C | 0.000000  | -1.449323 | -4.536072 |
| C | -1.192497 | -0.700200 | -4.532336 |
| C | -1.192497 | 0.700200  | -4.532336 |
| C | 0.000000  | 1.449323  | -4.536072 |
| C | -2.673636 | 1.086428  | -4.408404 |
| C | -3.045001 | 0.697856  | -2.973299 |
| C | -3.045001 | -0.697856 | -2.973299 |
| C | -2.673636 | -1.086428 | -4.408404 |
| C | -3.222966 | 1.437965  | -1.794951 |
| C | -3.378017 | 0.700153  | -0.599665 |
| C | -3.378017 | -0.700153 | -0.599665 |
| C | -3.222966 | -1.437965 | -1.794951 |
| O | -3.540112 | 1.405192  | 0.576160  |
| C | -3.336154 | 0.702806  | 1.735773  |
| C | -3.336154 | -0.702806 | 1.735773  |
| O | -3.540112 | -1.405192 | 0.576160  |
| C | -3.212731 | -1.422166 | 2.934656  |
| C | -3.053306 | -0.706584 | 4.159449  |
| C | -3.053306 | 0.706584  | 4.159449  |
| C | -3.212731 | 1.422166  | 2.934656  |
| O | -3.294250 | 0.000000  | -5.148474 |
| H | -2.990663 | 2.065599  | -4.783015 |
| H | -2.990663 | -2.065599 | -4.783015 |
| H | 2.990663  | -2.065599 | -4.783015 |
| H | 2.990663  | 2.065599  | -4.783015 |
| C | -3.236800 | 2.865507  | -1.794030 |
| N | -3.275580 | 4.039690  | -1.846118 |
| C | -3.236800 | -2.865507 | -1.794030 |
| N | -3.275580 | -4.039690 | -1.846118 |
| C | 0.000000  | 2.879758  | -4.570389 |
| N | 0.000000  | 4.054129  | -4.636164 |
| C | 0.000000  | -2.879758 | -4.570389 |
| N | 0.000000  | -4.054129 | -4.636164 |
| C | 3.236800  | -2.865507 | -1.794030 |
| N | 3.275580  | -4.039690 | -1.846118 |
| C | 3.236800  | 2.865507  | -1.794030 |
| N | 3.275580  | 4.039690  | -1.846118 |
| C | -3.256395 | -2.846821 | 2.912161  |
| N | -3.318278 | -4.021069 | 2.902173  |
| C | -3.256395 | 2.846821  | 2.912161  |

Supplementary Material for PCCP  
This journal is © The Owner Societies 2009

|   |           |           |          |
|---|-----------|-----------|----------|
| N | -3.318278 | 4.021069  | 2.902173 |
| C | -2.912690 | 1.424522  | 5.385247 |
| N | -2.800072 | 2.017845  | 6.394362 |
| C | -2.912690 | -1.424522 | 5.385247 |
| N | -2.800072 | -2.017845 | 6.394362 |
| C | 3.256395  | 2.846821  | 2.912161 |
| N | 3.318278  | 4.021069  | 2.902173 |
| C | 3.256395  | -2.846821 | 2.912161 |
| N | 3.318278  | -4.021069 | 2.902173 |
| C | 2.912690  | -1.424522 | 5.385247 |
| N | 2.800072  | -2.017845 | 6.394362 |
| C | 2.912690  | 1.424522  | 5.385247 |
| N | 2.800072  | 2.017845  | 6.394362 |
